# Supplementary material for: Direct Synthesis of Partially Chain-Straightened Propylene Oligomers and P-MA Co-Oligomers Using Axially Flexible Shielded Iminopyridyl Palladium Complexes
Source: MDPI journal article supplement (doi:10.3390/polym15010111), 2022-12-27
Supplement: s1 [file s1]

# Direct Synthesis of Partially Chain-Straightened Propylene Oligomers and P-MA Co-Oligomers Using Axially Flexible Shielded Iminopyridyl Palladium Complexes

Huayin Sun <sup>1</sup>, Huijun Fan <sup>2</sup>, Chuangao Zhu <sup>1</sup>, Wenping Zou <sup>3,\*</sup> and Shengyu Dai <sup>2,4,\*</sup>

<sup>1</sup> School of Chemical and Materials Engineering, Huainan Normal University, Huainan 232038, China

<sup>2</sup> Institutes of Physical Science and Information Technology, Key Laboratory of Structure and Functional Regulation of Hybrid Materials of Ministry of Education, Anhui University, Hefei 230601, China

<sup>3</sup> McKetta Department of Chemical Engineering, University of Texas at Austin, Austin, TX 78712, USA

<sup>4</sup> Jiangsu Key Laboratory of Advanced Catalytic Materials and Technology, Changzhou University, Changzhou 213164, China

\* Correspondence: wenping@utexas.edu (W.Z.); daiyu@ustc.edu.cn (S.D.)

## 1. Spectra Data

### 1.1 <sup>1</sup>H and <sup>13</sup>C NMR of Some Representative Propylene Oligomers and P-MA Co-oligomers.

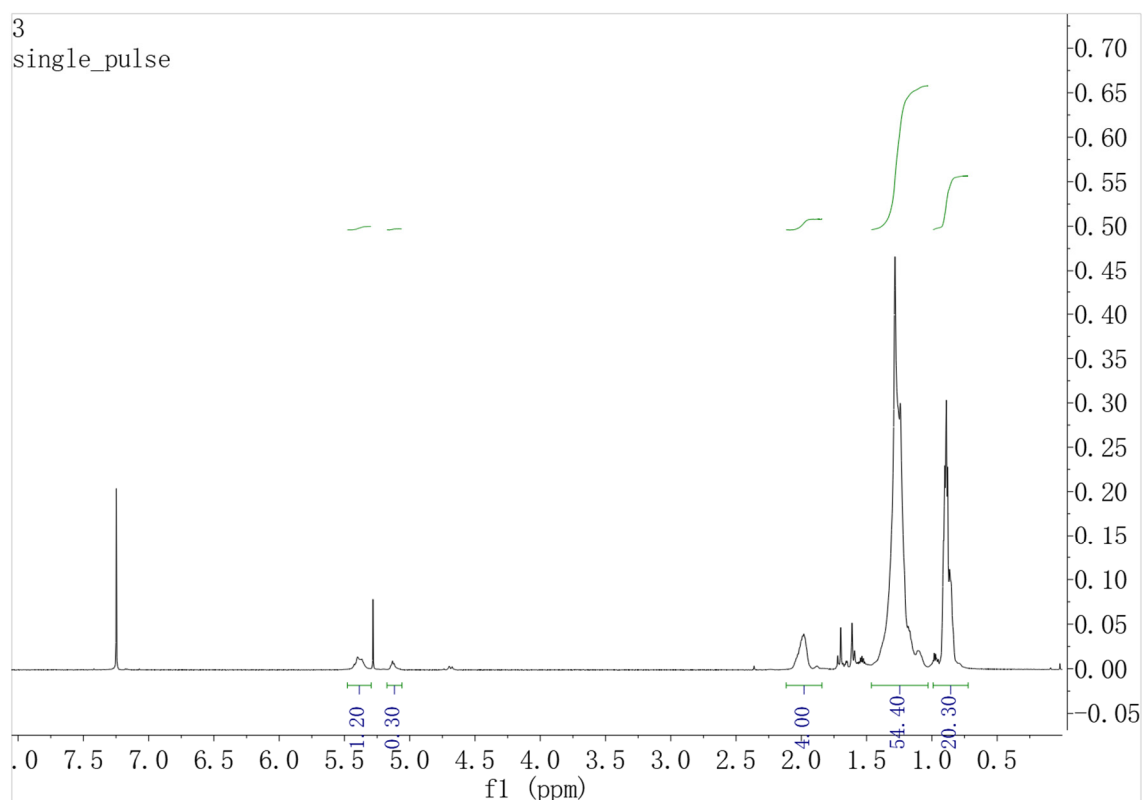

**Figure S1.** <sup>1</sup>H NMR spectrum of the propylene oligomer from table 1, entry 1.

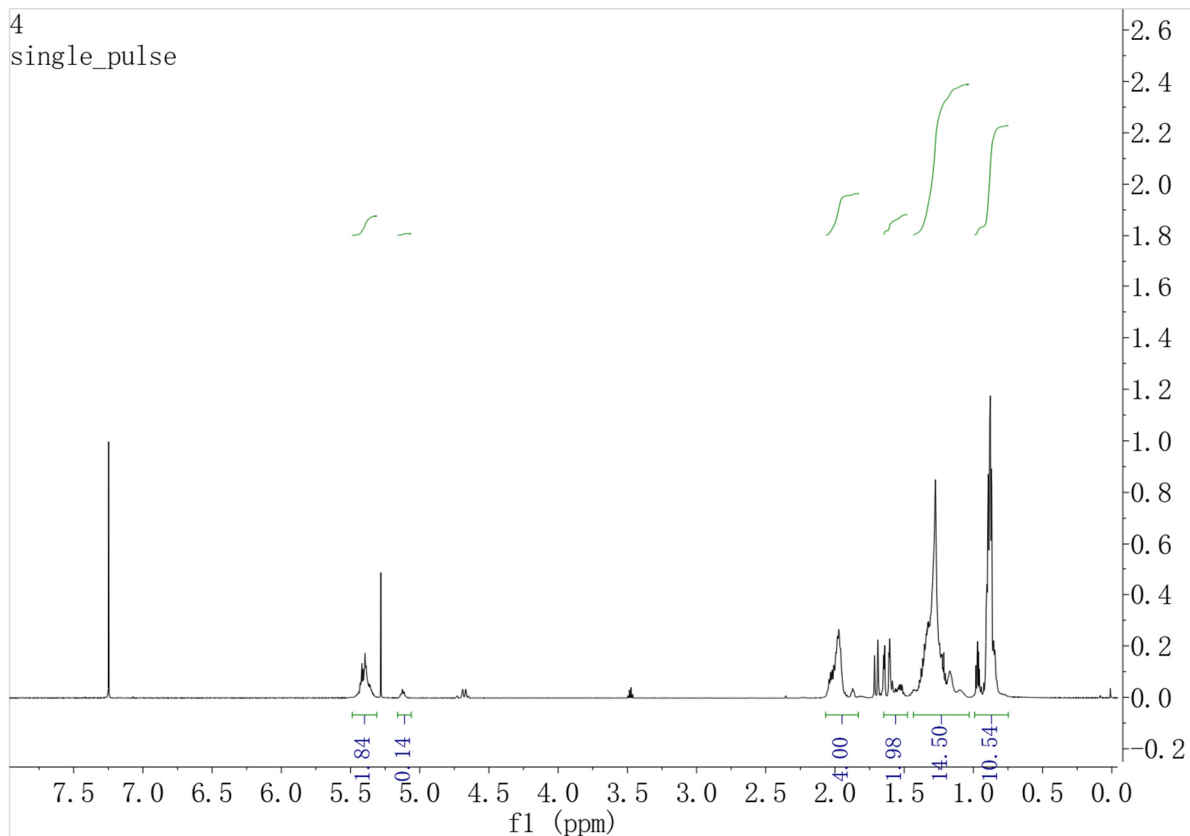

**Figure S2.**  $^1\text{H}$  NMR spectrum of the propylene oligomer from table 1, entry 2.

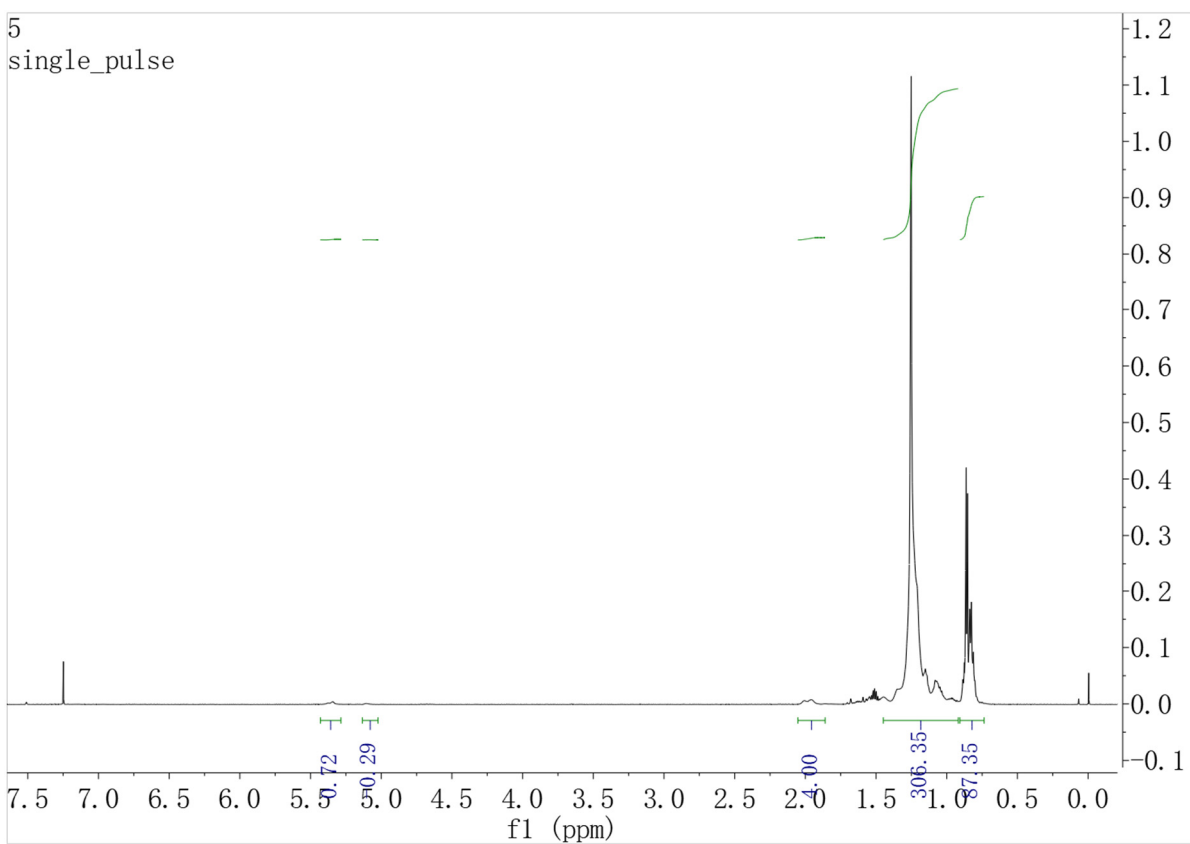

**Figure S3.**  $^1\text{H}$  NMR spectrum of the propylene oligomer from table 1, entry 3.

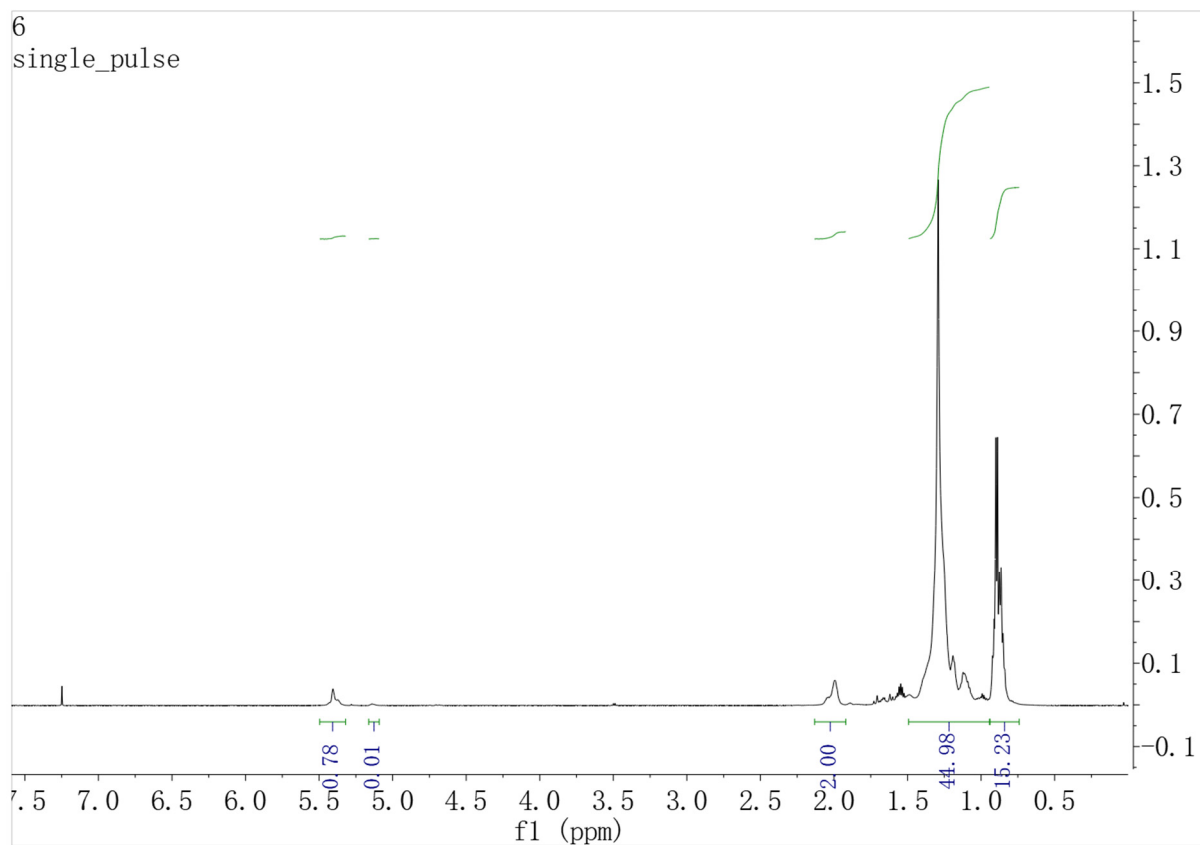

**Figure S4.**  $^1\text{H}$  NMR spectrum of the propylene oligomer from table 1, entry 4.

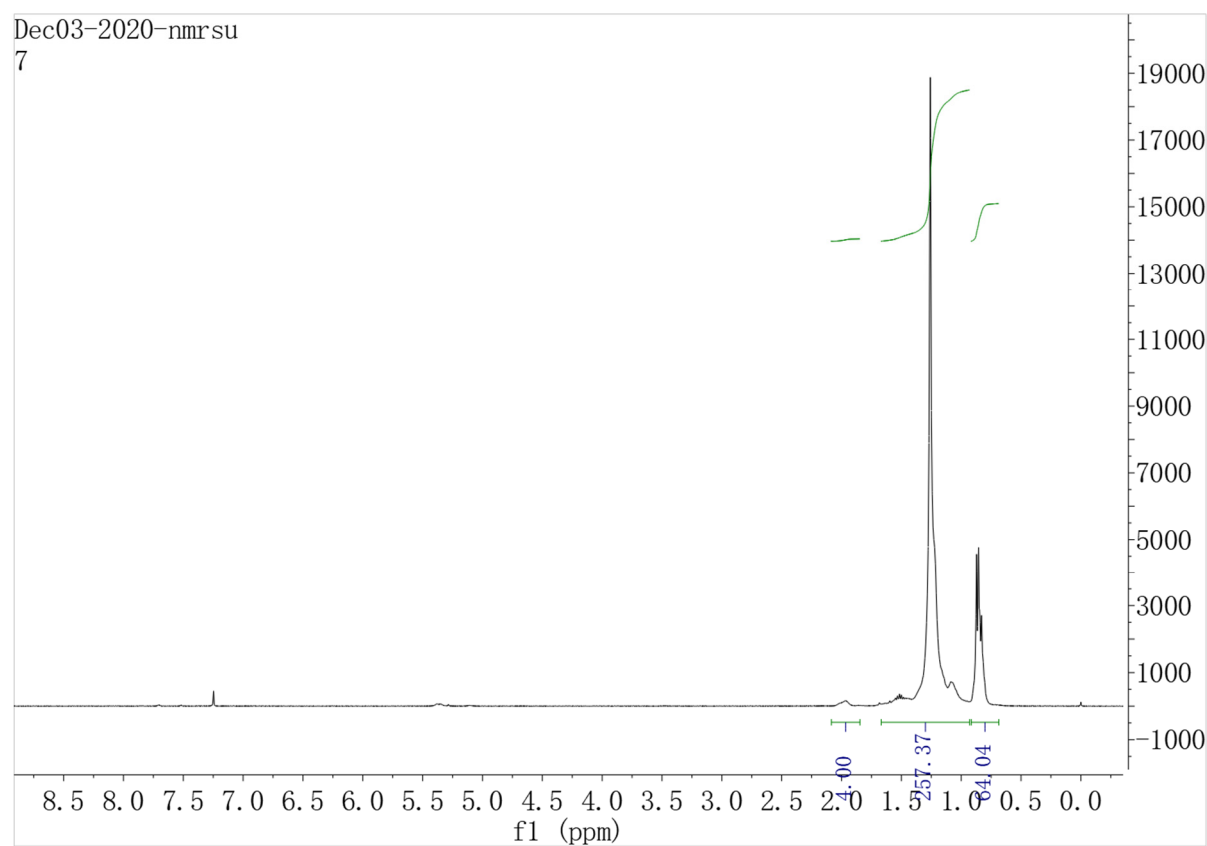

**Figure S5.**  $^1\text{H}$  NMR spectrum of the propylene oligomer from table 1, entry 5.

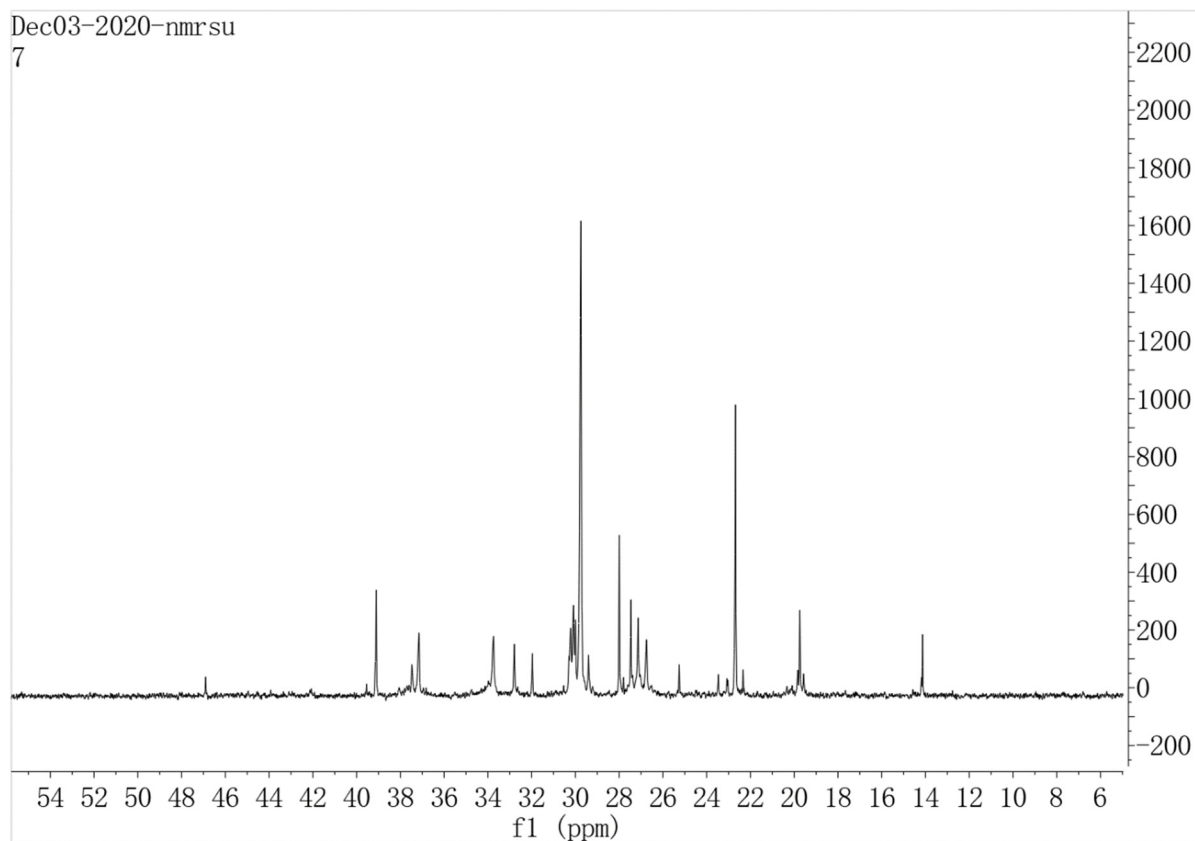

**Figure S6.**  $^{13}\text{C}$  NMR spectrum of the propylene oligomer from table 1, entry 5.

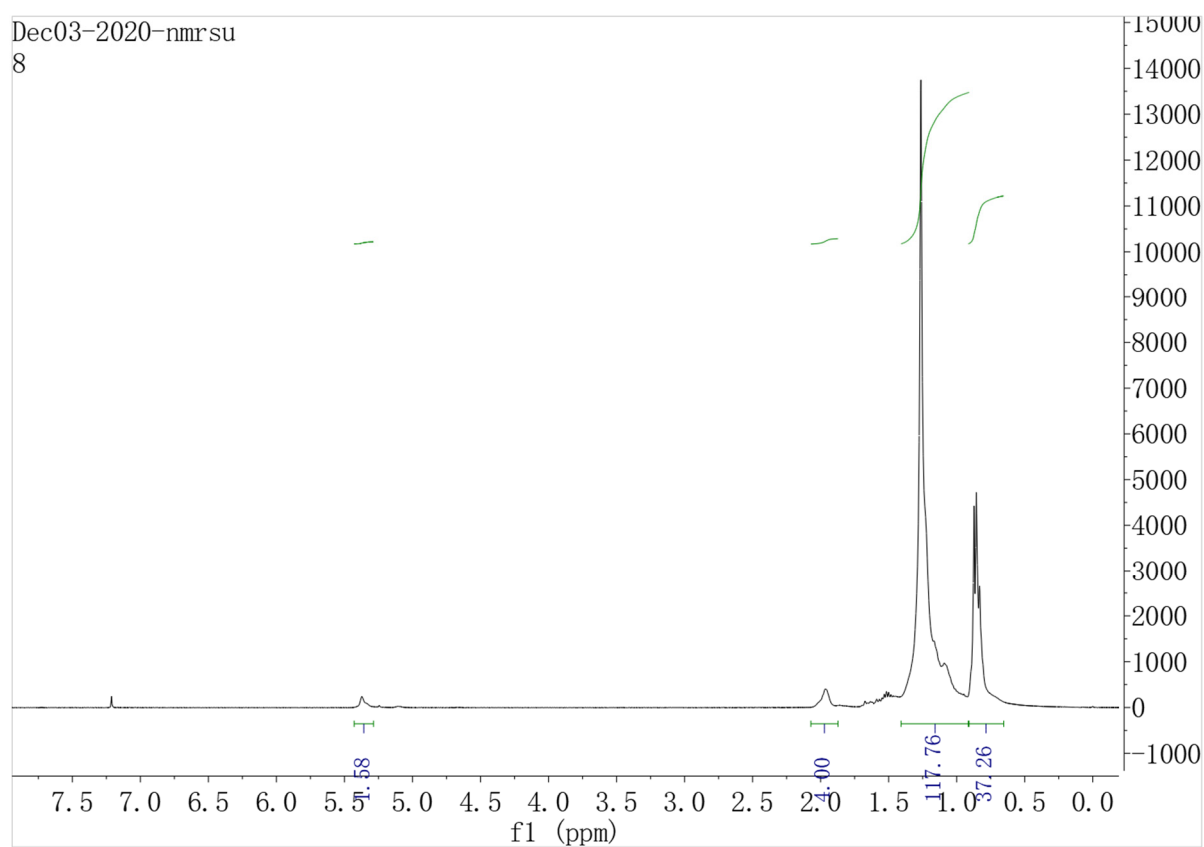

**Figure S7.**  $^1\text{H}$  NMR spectrum of the propylene oligomer from table 1, entry 6.

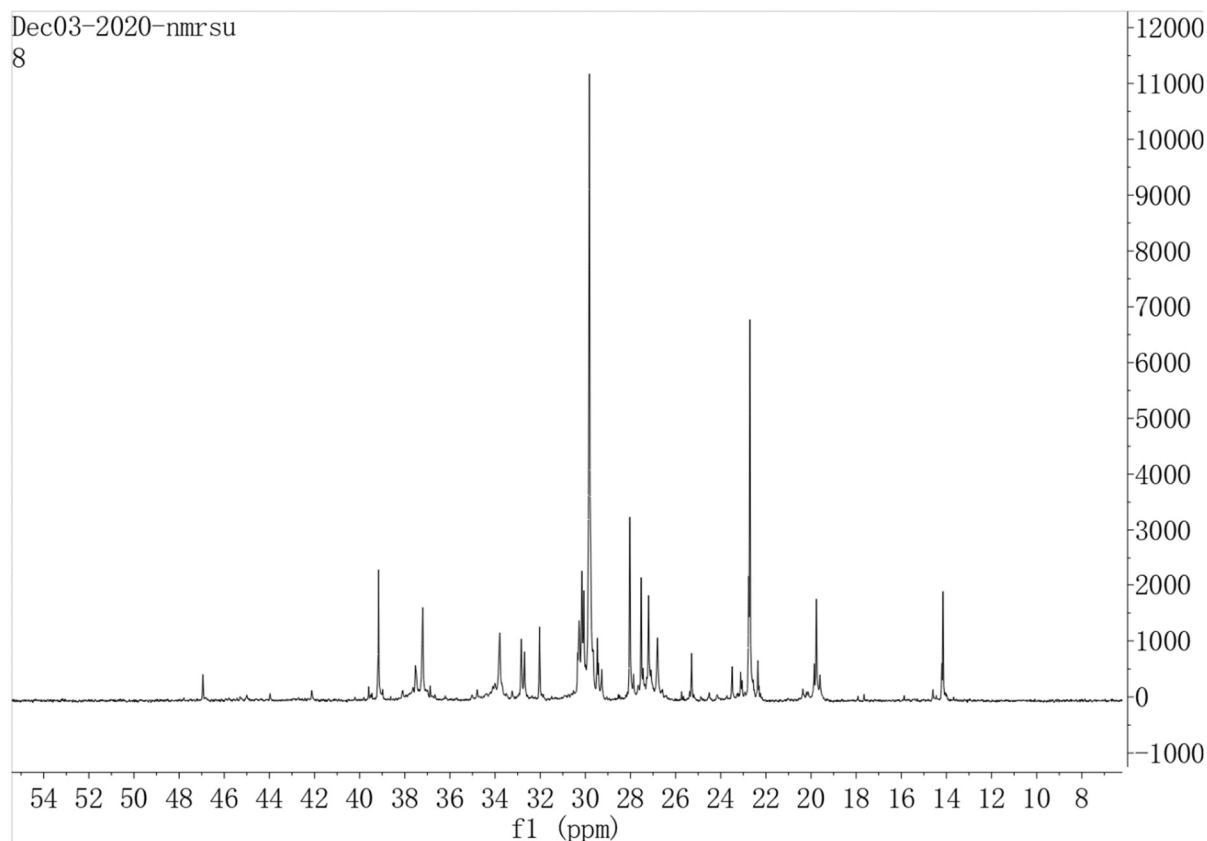

**Figure S8.**  $^{13}\text{C}$  NMR spectrum of the propylene oligomer from table 1, entry 6.

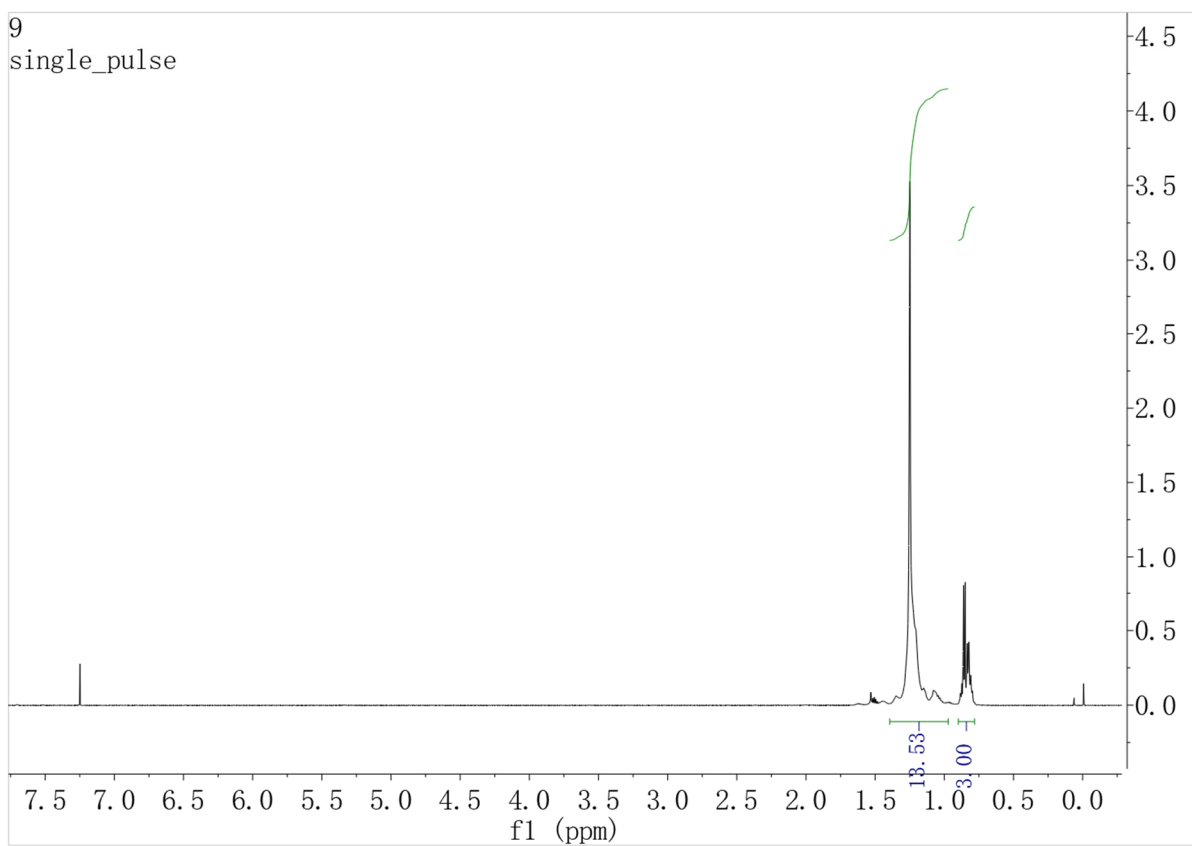

**Figure S9.**  $^1\text{H}$  NMR spectrum of the polypropylene from table 1, entry 7.

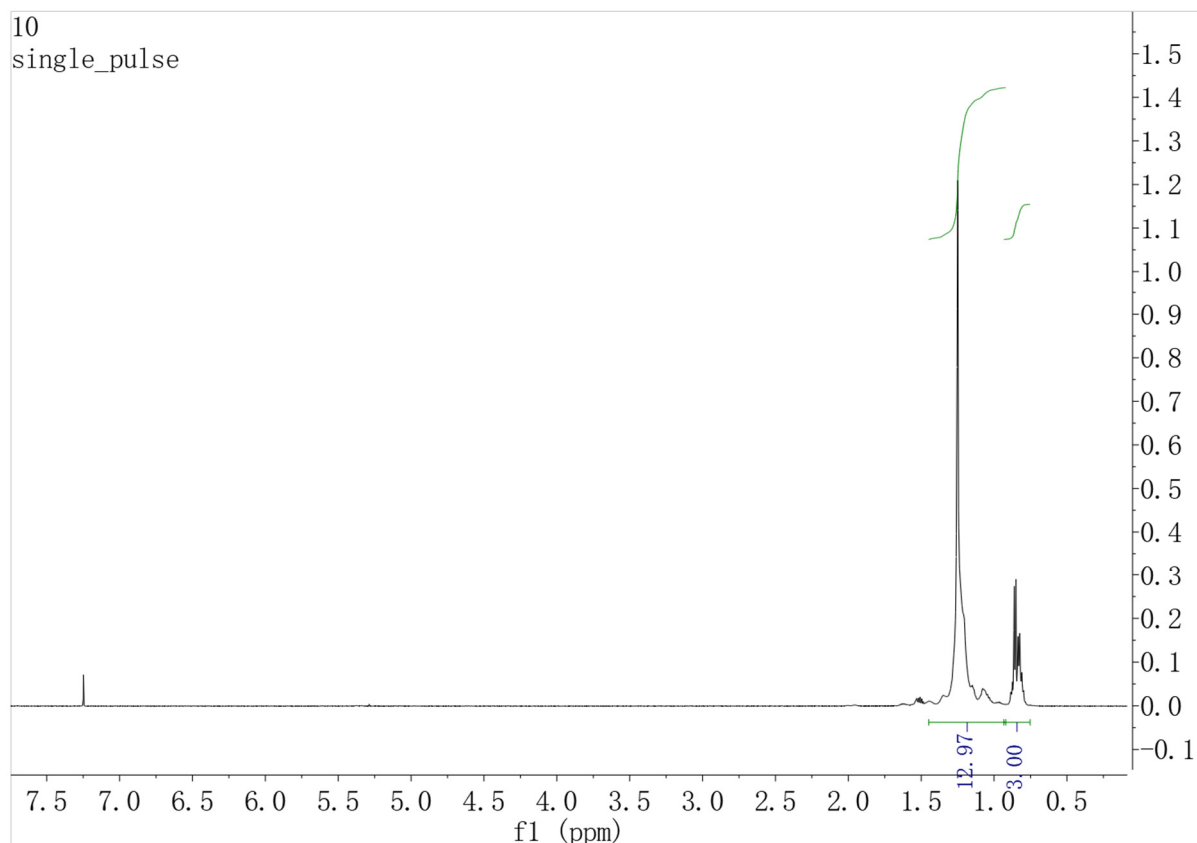

**Figure S10.**  $^1\text{H}$  NMR spectrum of the polypropylene from table 1, entry 8.

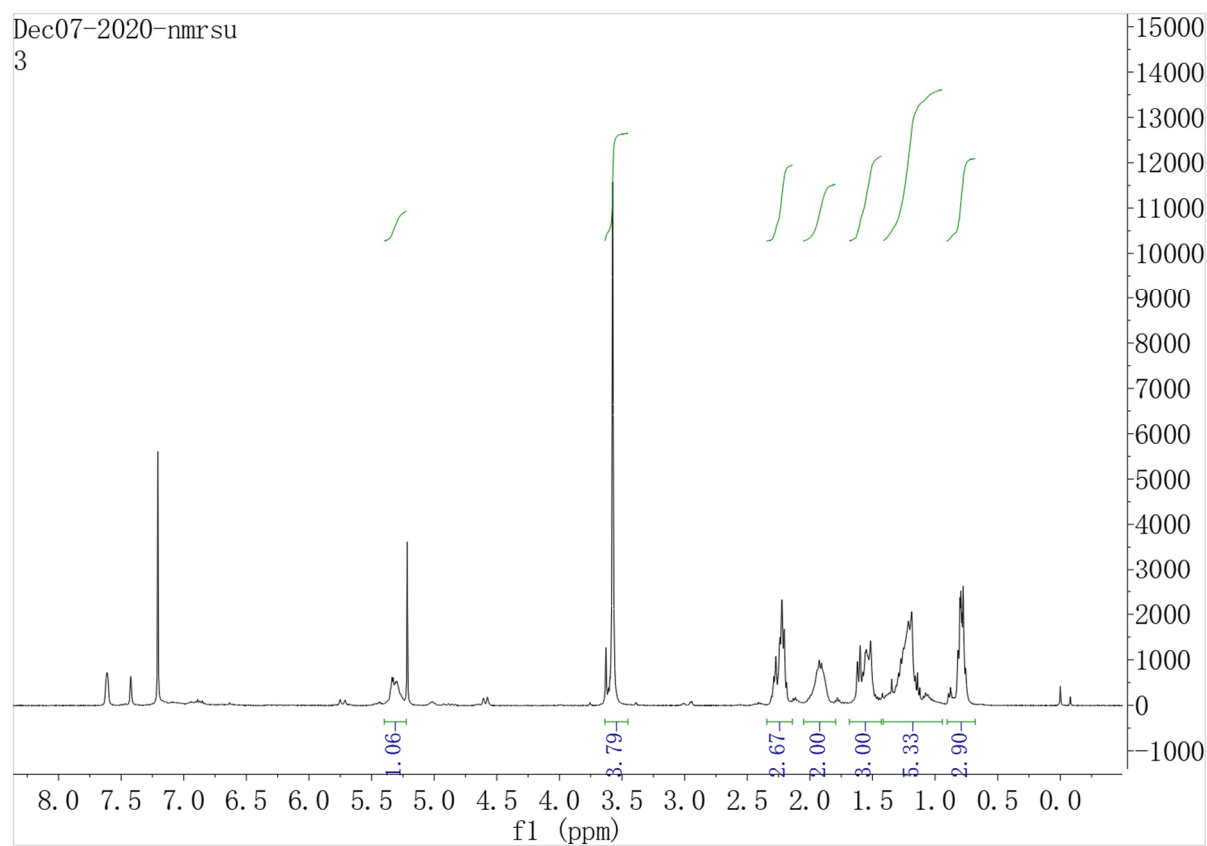

**Figure S11.**  $^1\text{H}$  NMR spectrum of the P-MA co-oligomer from table 2, entry 1.

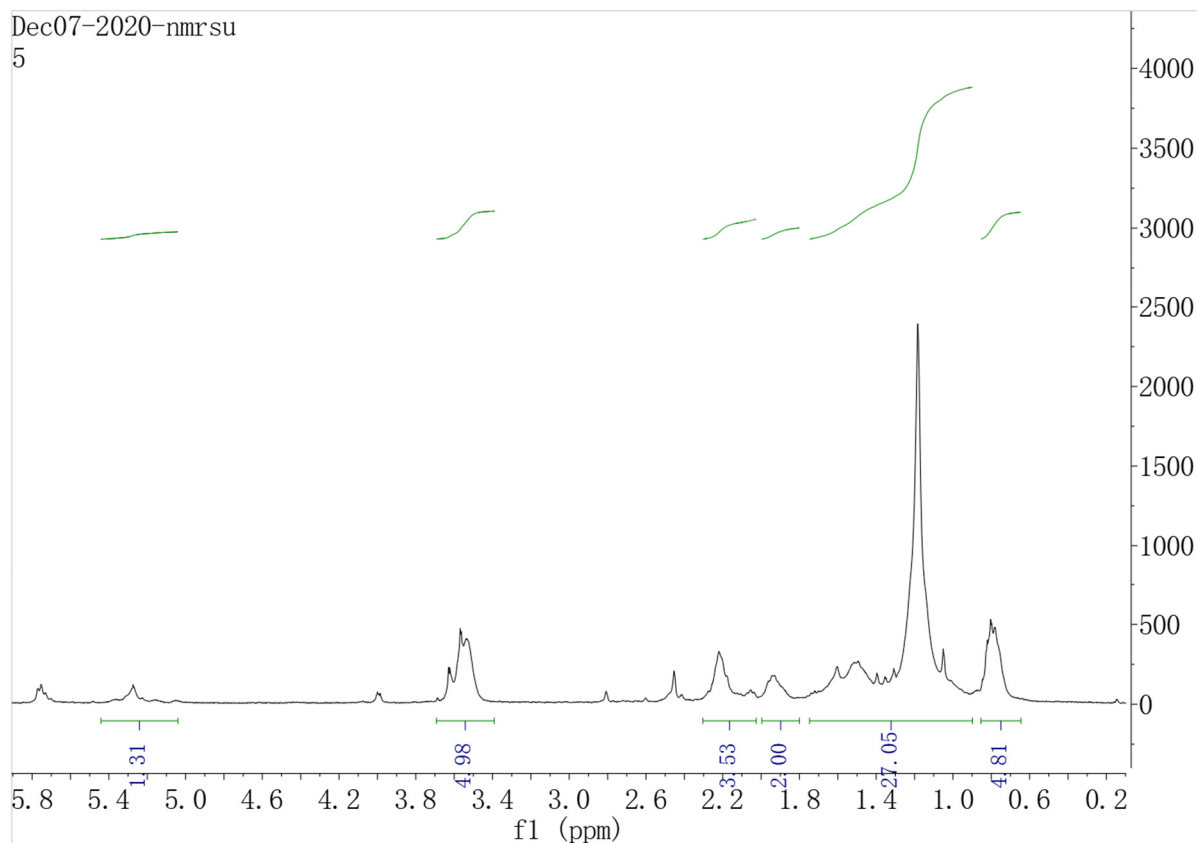

**Figure S12.**  $^1\text{H}$  NMR spectrum of the P-MA co-oligomer from table 2, entry 3.

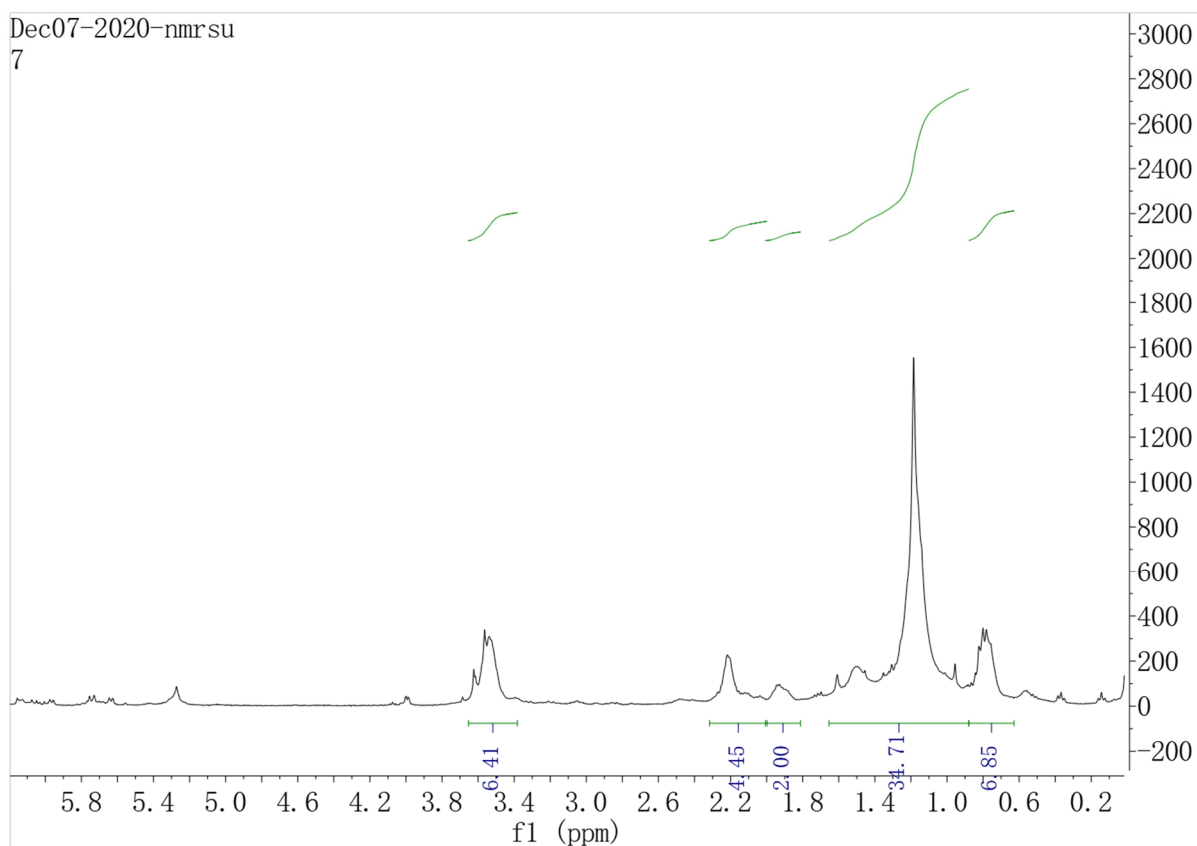

**Figure S13.**  $^1\text{H}$  NMR spectrum of the P-MA co-oligomer from table 2, entry 5.

## 1.2 SEC of Some Representative Propylene Oligomers and P-MA Co-oligomers.

[mV]

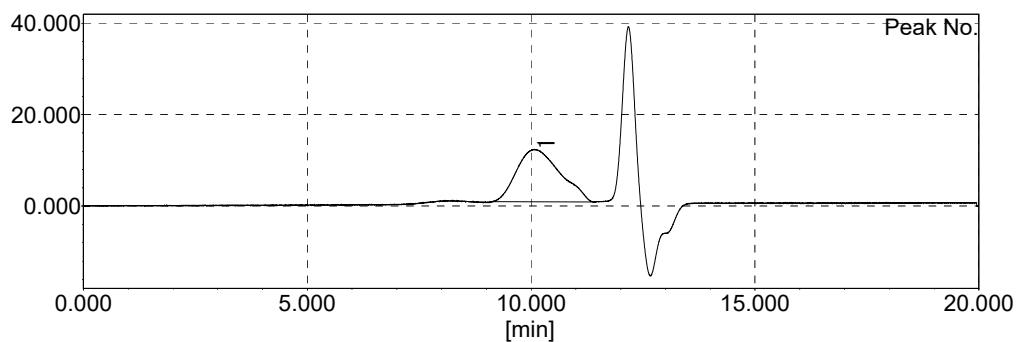

Result of molecular weight calculation (RI)

Peak 1 Base Peak

|               | [min]  | [mV]   | [mol]      | Mn      |       |
|---------------|--------|--------|------------|---------|-------|
| Peak start    | 9.118  | 0.956  | 6,640      | Mw      | 1,036 |
| Peak top      | 10.072 | 12.395 | 1,590      | Mz      | 2,161 |
| Peak end      | 11.397 | 0.898  | 218        | Mz+1    | 2,730 |
|               |        |        |            | Mv      | 1,563 |
| Height [mV]   |        |        | 11.463     | Mp      | 1,591 |
| Area [mV*sec] |        |        | 772.999    | Mz/Mw   | 1.383 |
| Area% [%]     |        |        | 100.000    | Mw/Mn   | 1.508 |
| [eta]         |        |        | 1562.59726 | Mz+1/Mw | 1.747 |

**Figure S14.** SEC of the propylene oligomer from table 1, entry 3.

[mV]

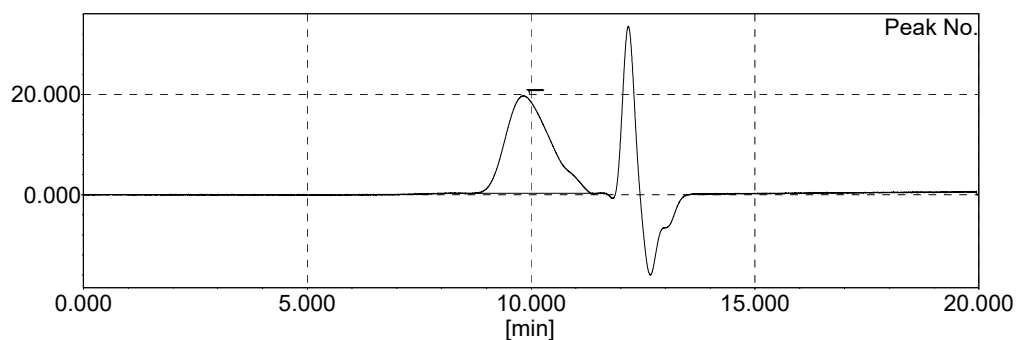

Result of molecular weight calculation (RI)

Peak 1 Base Peak

|               | [min]  | [mV]   | [mol]      | Mn      |       |
|---------------|--------|--------|------------|---------|-------|
| Peak start    | 8.745  | 0.279  | 11,620     | Mw      | 1,397 |
| Peak top      | 9.832  | 19.722 | 2,279      | Mz      | 2,220 |
| Peak end      | 11.517 | 0.307  | 182        | Mz+1    | 3,143 |
|               |        |        |            | Mv      | 4,052 |
| Height [mV]   |        |        | 19.432     | Mp      | 2,220 |
| Area [mV*sec] |        |        | 1336.045   | Mz/Mw   | 2,279 |
| Area% [%]     |        |        | 100.000    | Mw/Mn   | 1.416 |
| [eta]         |        |        | 2219.67740 | Mz+1/Mw | 1.589 |

**Figure S15.** SEC of the propylene oligomer from table 1, entry 6.



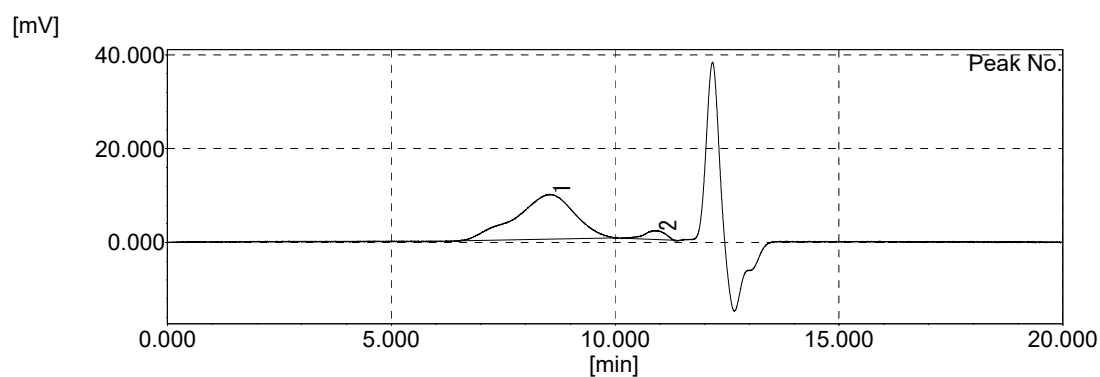

Result of molecular weight calculation (RI)

Peak 1 Base Peak

|               | [min]  | [mV]   | [mol]       | Mn      | 13,572  |
|---------------|--------|--------|-------------|---------|---------|
| Peak start    | 6.462  | 0.313  | 356,251     | Mw      | 32,921  |
| Peak top      | 8.543  | 10.234 | 15,722      | Mz      | 77,329  |
| Peak end      | 10.077 | 0.961  | 1,578       | Mz+1    | 128,529 |
|               |        |        |             | Mv      | 32,921  |
| Height [mV]   |        |        | 9.548       | Mp      | 15,723  |
| Area [mV*sec] |        |        | 876.898     | Mz/Mw   | 2.349   |
| Area% [%]     |        |        | 93.393      | Mw/Mn   | 2.426   |
| [eta]         |        |        | 32920.53959 | Mz+1/Mw | 3.904   |

Figure S16. SEC of the polypropylene from table 1, entry 7.

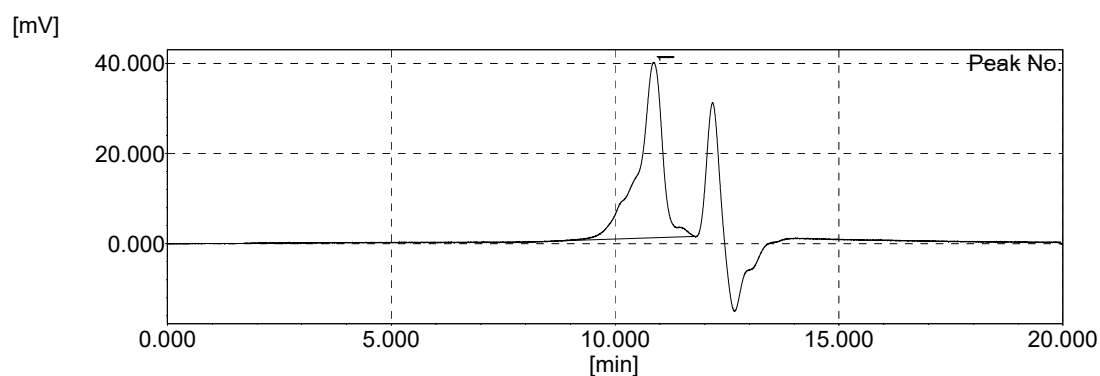

Result of molecular weight calculation (RI)

Peak 1 Base Peak

|               | [min]  | [mV]   | [mol]     | Mn      | 540   |
|---------------|--------|--------|-----------|---------|-------|
| Peak start    | 8.787  | 0.670  | 10,917    | Mw      | 741   |
| Peak top      | 10.865 | 40.257 | 484       | Mz      | 1,194 |
| Peak end      | 11.830 | 1.635  | 113       | Mz+1    | 2,190 |
|               |        |        |           | Mv      | 741   |
| Height [mV]   |        |        | 38.928    | Mp      | 484   |
| Area [mV*sec] |        |        | 1467.768  | Mz/Mw   | 1.610 |
| Area% [%]     |        |        | 100.000   | Mw/Mn   | 1.373 |
| [eta]         |        |        | 741.29876 | Mz+1/Mw | 2.955 |

Figure S17. SEC of the P-MA co-oligomer from table 2, entry 3.

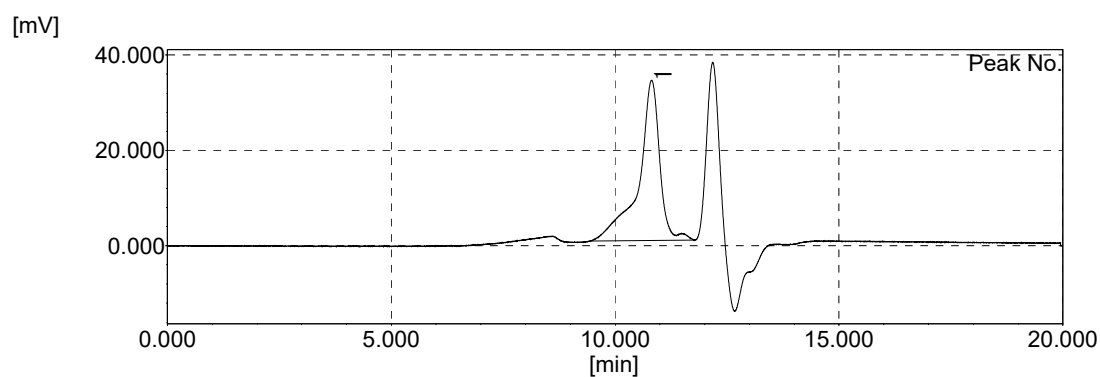

Result of molecular weight calculation (RI)

Peak 1 Base Peak

|               | [min]  | [mV]   | [mol]     | Mn      |       |
|---------------|--------|--------|-----------|---------|-------|
| Peak start    | 9.448  | 0.997  | 4,049     | Mw      | 562   |
| Peak top      | 10.808 | 34.676 | 527       | Mz      | 739   |
| Peak end      | 11.787 | 1.198  | 121       | Mz+1    | 1,063 |
|               |        |        |           | Mv      | 1,538 |
| Height [mV]   |        |        | 33.562    | Mp      | 739   |
| Area [mV*sec] |        |        | 1099.336  | Mz/Mw   | 527   |
| Area% [%]     |        |        | 100.000   | Mw/Mn   | 1.439 |
| [eta]         |        |        | 739.09892 | Mz+1/Mw | 1.316 |
|               |        |        |           |         | 2.080 |

**Figure S18.** SEC of the P-MA co-oligomer from table 2, entry 5.

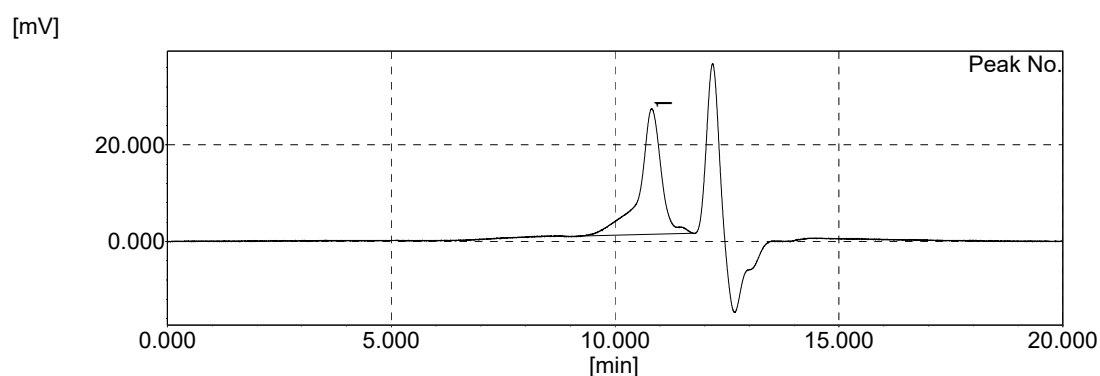

Result of molecular weight calculation (RI)

Peak 1 Base Peak

|               | [min]  | [mV]   | [mol]     | Mn      |       |
|---------------|--------|--------|-----------|---------|-------|
| Peak start    | 9.822  | 1.472  | 2,313     | Mw      | 476   |
| Peak top      | 10.890 | 19.865 | 466       | Mz      | 576   |
| Peak end      | 11.743 | 2.201  | 129       | Mz+1    | 709   |
|               |        |        |           | Mv      | 881   |
| Height [mV]   |        |        | 17.988    | Mp      | 576   |
| Area [mV*sec] |        |        | 617.993   | Mz/Mw   | 466   |
| Area% [%]     |        |        | 100.000   | Mw/Mn   | 1.230 |
| [eta]         |        |        | 576.07861 | Mz+1/Mw | 1.210 |
|               |        |        |           |         | 1.530 |

**Figure S19.** SEC of the P-MA co-oligomer from table 2, entry 7.
